# Supplementary material for: Carbon/metal nanotubes with tailored order and configuration by direct carbonization of inverse block copolymer micelles inside nanoporous alumina
Source: Royal Society of Chemistry journal article supplement (doi:10.1039/c1cc15597k), 2011-11-04
Supplement: c1cc15597k.pdf [file c1cc15597k.pdf]

## Supporting Information

### Carbon/Metal Nanotubes by Direct Carbonization of Inverse Block Copolymer Micelles Inside Nanoporous Alumina

Yu Jin Jang,<sup>†, §</sup> Yoon Hee Jang,<sup>†, §</sup> Martin Steinhart,<sup>\*, ‡</sup> and Dong Ha Kim<sup>\*, †</sup>

<sup>†</sup>Department of Chemistry and Nano Science, Ewha Womans University, 62, Ewhayeodae-Gil, Seodaemun-Gu, Seoul 120-750, Korea

<sup>‡</sup>Institute for Chemistry, University of Osnabrück, Barbarastr. 7, 49069 Osnabrück, Germany

<sup>§</sup>The authors contributed equally to this work.

Corresponding authors: [dhkim@ewha.ac.kr](mailto:dhkim@ewha.ac.kr), [martin.steinhart@uos.de](mailto:martin.steinhart@uos.de)

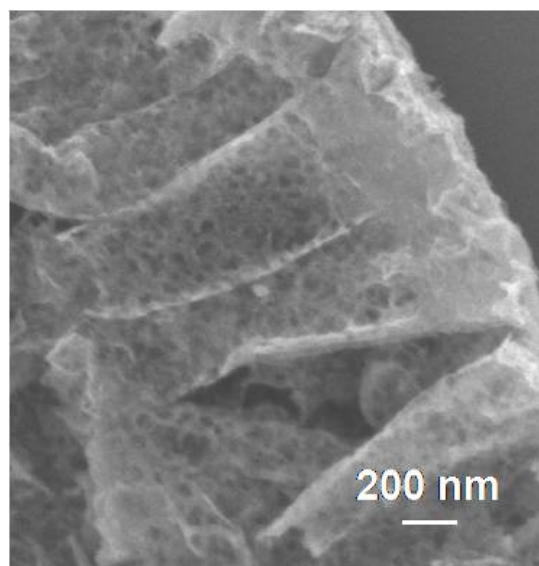

**Figure S1.** SEM image of hCNTs-1 with Au NPs in low magnification.

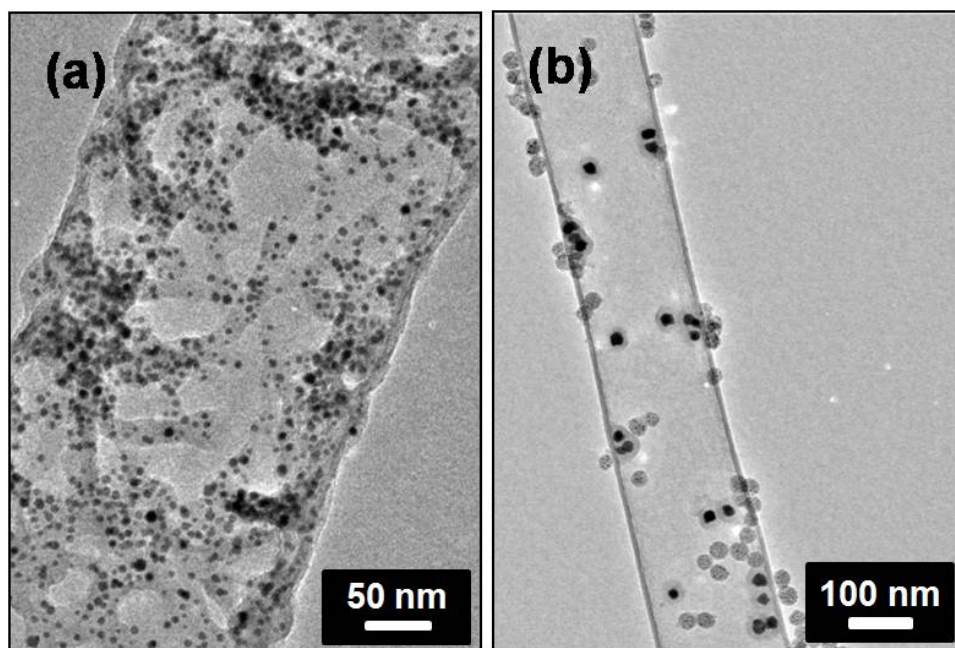

**Figure S2.** TEM images of hCNTs-1 containing Au NPs (a) and hCNTs-2 containing Pt NPs (b).

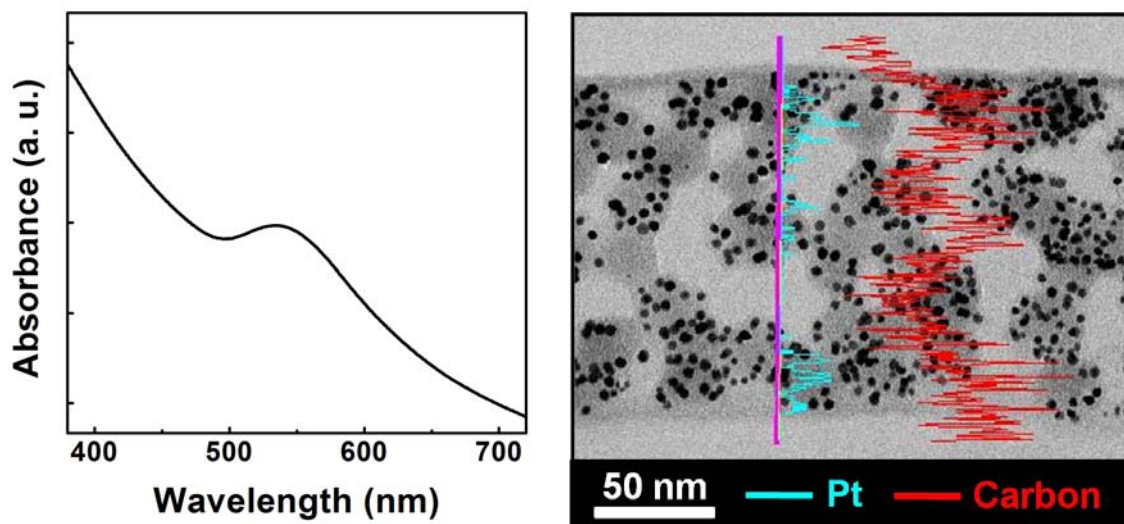

**Figure S3.** UV-visible absorption spectrum of hCNTs-2 containing Au NPs (left). Magnified TEM image and EDX line-scan profiles of a hCNT-1 containing Pt NPs (right).
